# Supplementary material
Source: publisher site journal article supplement (https://www.dovepress.com/article/225661)
Supplement: Supplementary file 1 [file get_supplementary_file.php]

**Table S1. Sequences of primers**

| Primer     | Sequence                                                                        |
|------------|---------------------------------------------------------------------------------|
| XIST       | 5'-ACGCTGCATGTGTCCTTAG-3' (forward)<br>5'-GAGCCTCTTATAGCTGTTTG-3' (reverse)     |
| miR-139-5p | 5'-CAGCGGTCTACAGTGCACGT-3'(forward)<br>5'-CAG TGCAGGGTCCGAGGT-3'(reverse)       |
| ROCK1      | 5'-AACATGCTGCTGGATAAATCTGG-3'(forward)<br>5'-TGTATCACATCGTACCATGCCT-3'(reverse) |
| GAPDH      | 5'-CATGAGAAGTATGACAACAGCCT-3'(forward)<br>5'-AGTCCTTCCACGATACCAAAGT 3'(reverse) |
| U6         | 5'-CTCGCTTCGGCAGCACA-3' (forward)<br>5'-AACGCTTCACGAATTTGCGT-3'(reverse)        |

**Table S2. Correlation of XIST expression and clinicopathological features in melanoma.**

| Variables                    | XIST expression     |                             |                              | p value      |
|------------------------------|---------------------|-----------------------------|------------------------------|--------------|
|                              | All cases<br>(n=62) | Low<br>expression<br>(n=25) | High<br>Expression<br>(n=37) |              |
| <b>Age (years)</b>           |                     |                             |                              | 0.960        |
| ≤ 60                         | 32                  | 13                          | 19                           |              |
| > 60                         | 30                  | 12                          | 18                           |              |
| <b>Sex</b>                   |                     |                             |                              | 0.502        |
| Male                         | 34                  | 15                          | 19                           |              |
| Female                       | 28                  | 10                          | 18                           |              |
| <b>TNM stage</b>             |                     |                             |                              | <b>0.025</b> |
| 0-I                          | 41                  | 22                          | 19                           |              |
| II-IV                        | 21                  | 5                           | 16                           |              |
| <b>Invasion</b>              |                     |                             |                              | 0.966        |
| T0-T2                        | 37                  | 15                          | 22                           |              |
| T3-T4                        | 25                  | 10                          | 15                           |              |
| <b>Lymph node metastasis</b> |                     |                             |                              | <b>0.001</b> |
| Positive                     | 26                  | 17                          | 9                            |              |
| Negative                     | 36                  | 8                           | 28                           |              |
| <b>Distal metastasis</b>     |                     |                             |                              | 0.144        |
| Positive                     | 23                  | 12                          | 11                           |              |
| Negative                     | 39                  | 13                          | 26                           |              |

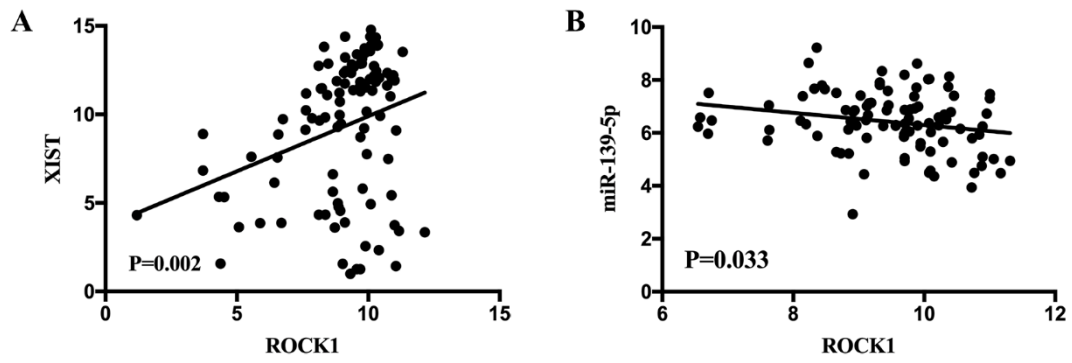

**Supplementary Fig 1:** (A) Correlation assay between ROCK1 and XIST in melanoma tumor tissues. (B) Correlation assay between ROCK1 and miR-139-5p in melanoma tumor tissues. Data were obtained from LinkedOmics.
